# Supplementary material
Source: ML conference proceedings conference paper supplement (https://openaccess.thecvf.com/content/CVPR2023/html/Wei_Enhancing_the_Self-Universality_CVPR_2023_paper.html)
Supplement: Supplementary file 1 [file Wei_Enhancing_the_Self-Universality_CVPR_2023_supplemental.pdf]

# – Supplemental Material –

## Enhancing the Self-Universality for Transferable Targeted Attack

Zhipeng Wei<sup>1,2</sup>, Jingjing Chen<sup>1,2,†</sup>, Zuxuan Wu<sup>1,2</sup>, Yu-Gang Jiang<sup>1,2</sup>

<sup>1</sup>Shanghai Key Lab of Intell. Info. Processing, School of CS, Fudan University

<sup>2</sup>Shanghai Collaborative Innovation Center of Intelligent Visual Computing

zpwei21@m.fudan.edu.cn, {chenjingjing, zxwu, ygj}@fudan.edu.cn

### 1. Standard Deviation of Single-model Transferable Attacks

The standard deviation express the variability of data. We show the standard deviation of single-model transferable attacks in Table 1. We observe that the standard deviation is low. It demonstrates that our method steadily improve TASR.

### 2. Visualization of Adversarial Examples

We visualize 8 benign images and their corresponding adversarial images in Figure 1. As can be seen, these adversarial examples, which humans can correctly understand, fool DNNs into the specific target prediction.

### 3. Performance Comparison with $\epsilon = 8$

We conduct experiments with  $\epsilon = 8$ . Specifically, we set the weight parameter  $\lambda = 10^{-3}$ , the scale parameters  $s = (0.1, 0)$ , and use the layer 3 to extract features. The results are shown in Table 2. First,  $\epsilon = 8$  achieves worse performance than  $\epsilon = 16$ , because the difficulty of targeted attacks increases when lowering  $\epsilon$  to 8. Besides, the proposed SU can improve TASR in most cases. It demonstrates the effectiveness of SU.

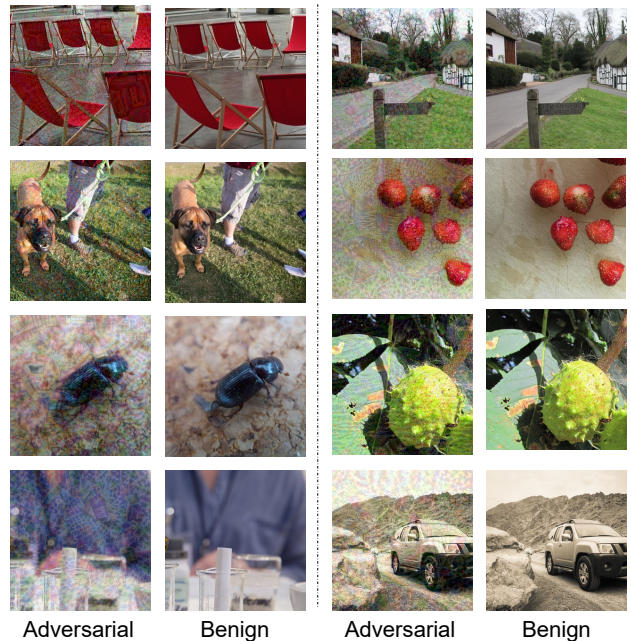

Figure 1. TASR (%) of attacking ResNet50 from DenseNet121.

<sup>†</sup>Corresponding author.

| Attack        | White-box Model: Res50 |                |                | White-box Model: Dense121 |                |                |
|---------------|------------------------|----------------|----------------|---------------------------|----------------|----------------|
|               | → Dense121             | → VGG16        | → Inc-v3       | → Res50                   | → VGG16        | → Inc-v3       |
| DTMI-CE       | 0.9/0.94/1.5           | 0.24/0.3/0.58  | 0.0/0.05/0.01  | 0.08/0.17/0.01            | 0.39/0.02/0.01 | 0.1/0.11/0.06  |
| DTMI-CE-SU    | 0.03/1.6/0.78          | 0.01/0.12/0.55 | 0.02/0.08/0.17 | 0.01/0.44/0.38            | 0.05/0.48/0.07 | 0.01/0.03/0.04 |
| DTMI-Logit    | 0.38/0.99/0.8          | 0.24/0.43/0.69 | 0.25/0.28/0.09 | 0.51/0.62/0.03            | 0.48/0.44/0.58 | 0.01/0.25/0.03 |
| DTMI-Logit-SU | 0.54/0.43/0.2          | 0.03/0.14/0.6  | 0.02/0.68/0.25 | 0.1/1.39/0.11             | 0.14/0.07/0.41 | 0.02/0.16/0.08 |
| Attack        | White-box Model: VGG16 |                |                | White-box Model: Inc-v3   |                |                |
|               | → Res50                | → Dense121     | → Inc-v3       | → Res50                   | → Dense121     | → VGG16        |
| DTMI-CE       | 0.01/0.06/0.01         | 0.02/0.02/0.0  | 0.0/0.0/0.0    | 0.0/0.04/0.22             | 0.0/0.07/0.0   | 0.06/0.28/0.02 |
| DTMI-CE-SU    | 0.0/0.06/0.1           | 0.0/0.06/0.38  | 0.0/0.0/0.0    | 0.02/0.03/0.1             | 0.0/0.08/0.04  | 0.0/0.18/0.0   |
| DTMI-Logit    | 0.04/0.01/0.01         | 0.02/0.07/0.14 | 0.0/0.02/0.04  | 0.07/0.05/0.01            | 0.03/0.02/0.0  | 0.01/0.06/0.03 |
| DTMI-Logit-SU | 0.03/0.13/0.03         | 0.12/0.6/0.19  | 0.01/0.05/0.0  | 0.1/1.39/0.11             | 0.14/0.07/0.41 | 0.02/0.16/0.08 |

Table 1. The standard deviation of TASR (%) of Table 2. We use ResNet50, DenseNet121, VGGNet16 and Inception-v3 as the white-box model respectively. We conduct these experiments three times and report the standard deviation of TASR with 20/100/300 iterations.

| Attack        | White-box Model: Res50 |               |             | White-box Model: Dense121 |               |             |
|---------------|------------------------|---------------|-------------|---------------------------|---------------|-------------|
|               | → Dense121             | → VGG16       | → Inc-v3    | → Res50                   | → VGG16       | → Inc-v3    |
| DTMI-CE       | 11.0/19.6/21.8         | 7.6/15.0/15.1 | 0.3/0.5/0.7 | 4.4/6.4/6.1               | 2.7/4.6/3.8   | 0.1/0.3/0.3 |
| DTMI-CE-SU    | 1.4/7.9/21.7           | 0.8/6.4/18.8  | 0.1/0.5/1.0 | 0.6/5.4/12.8              | 0.5/3.5/10.8  | 0.0/0.4/1.0 |
| DTMI-Logit    | 11.7/34.2/40.8         | 9.1/30.5/38.4 | 0.2/0.8/0.9 | 6.4/18.6/21.7             | 4.4/14.9/18.5 | 0.0/0.8/1.0 |
| DTMI-Logit-SU | 7.9/33.0/45.7          | 5.2/30.7/41.3 | 0.2/1.4/1.1 | 3.4/18.4/23.2             | 2.5/15.5/23.3 | 0.1/1.0/1.1 |
| Attack        | White-box Model: VGG16 |               |             | White-box Model: Inc-v3   |               |             |
|               | → Res50                | → Dense121    | → Inc-v3    | → Res50                   | → Dense121    | → VGG16     |
| DTMI-CE       | 0.2/0.1/0.2            | 0.0/0.0/0.0   | 0.0/0.0/0.0 | 0.4/0.7/0.8               | 0.1/0.6/1.1   | 0.2/0.2/0.7 |
| DTMI-CE-SU    | 0.0/0.7/1.2            | 0.0/0.7/1.0   | 0.0/0.0/0.0 | 0.1/0.1/0.6               | 0.0/0.3/1.4   | 0.1/0.3/0.6 |
| DTMI-Logit    | 0.8/2.0/2.5            | 0.3/2.3/2.8   | 0.0/0.0/0.0 | 0.3/0.7/1.0               | 0.3/0.9/0.9   | 0.2/0.4/1.0 |
| DTMI-Logit-SU | 0.8/3.1/3.9            | 0.3/4.0/4.6   | 0.0/0.0/0.0 | 0.2/0.8/1.5               | 0.3/1.2/1.6   | 0.1/0.4/1.0 |

Table 2. TASR (%) of all black-box models under four attack scenarios using ResNet50, DenseNet121, VGGNet16 and Inception-v3 as white-box models, respectively. We conduct these experiments three times and report average TASR with 20/100/300 iterations, the standard deviation are shown in Appendix. The best results with 300 iterations are in bold.
